# Supplementary material for: Discrimination of Excited States of Acetylacetone through Theoretical Molecular-Frame Photoelectron Angular Distributions
Source: MDPI journal article supplement (doi:10.3390/molecules27061811), 2022-03-10
Supplement: s1 [file s1]

# Supplementary Materials: DISCRIMINATION OF EXCITED STATES OF ACETYLACETONE THROUGH THEORETICAL MOLECULAR-FRAME PHOTOELECTRON ANGULAR DISTRIBUTIONS

Aurora Ponzi <sup>1\*</sup> , Marin Sapunar <sup>1,a</sup> , Nađa Došlić<sup>1</sup>  and Piero Decleva <sup>2\*</sup> 

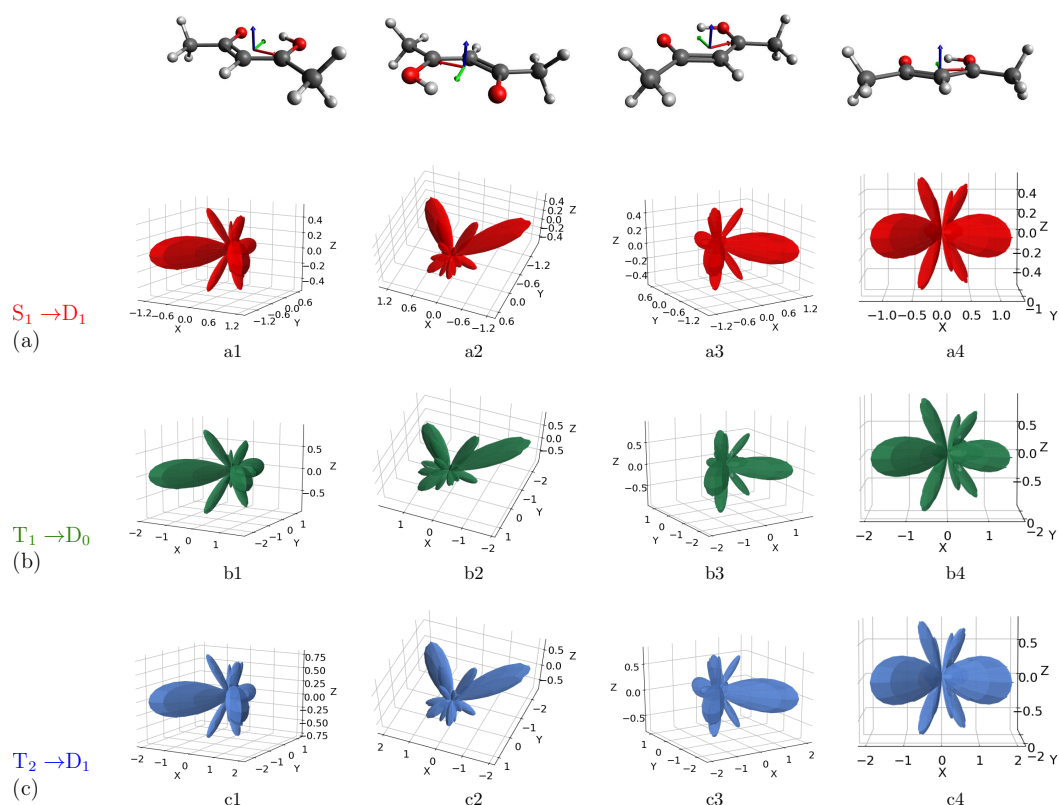

**Figure S1.** Computed MFPADs for the photoionization from the  $S_1$  (a),  $T_1$  (b), and  $T_2$  (c) excited states of acetylacetone to the corresponding first ionic state, at the selected kinetic energy of 6.04 eV. The electric field is oriented along the z axis. Orientation of the molecule is also shown on top of figure (x, y, z axes are respectively identified by red, green and blue colours).

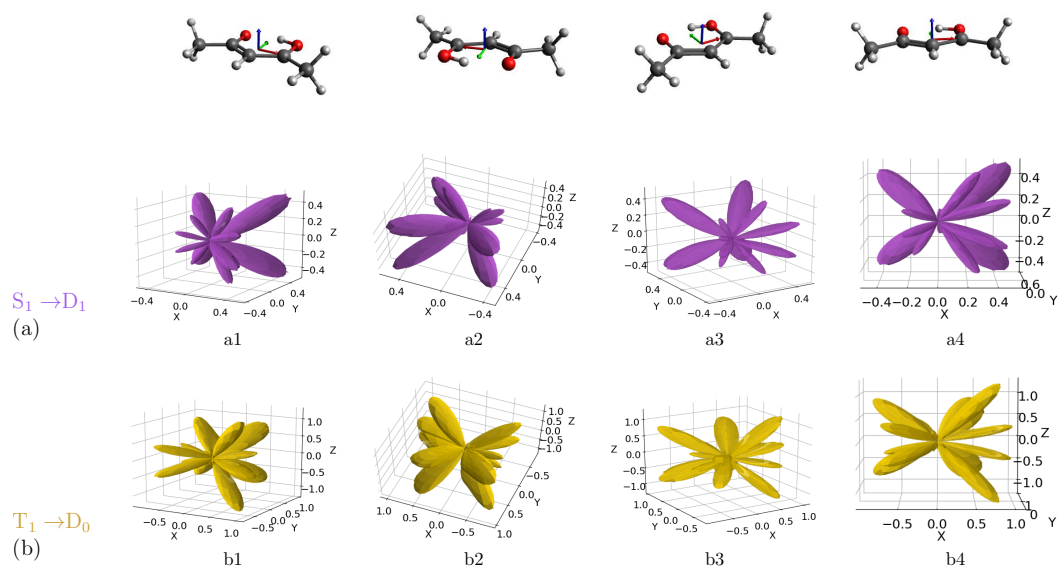

**Figure S2.** Computed MFPADs for the photoionization from the  $S_1$  (a) and  $T_1$  (b) excited states of acetylacetone to the corresponding first ionic state, at the selected kinetic energy of 7.14 eV. The electric field is oriented along the x axis. Orientation of the molecule is also shown on top of figure (x, y, z axes are respectively identified by red, green and blue colours).

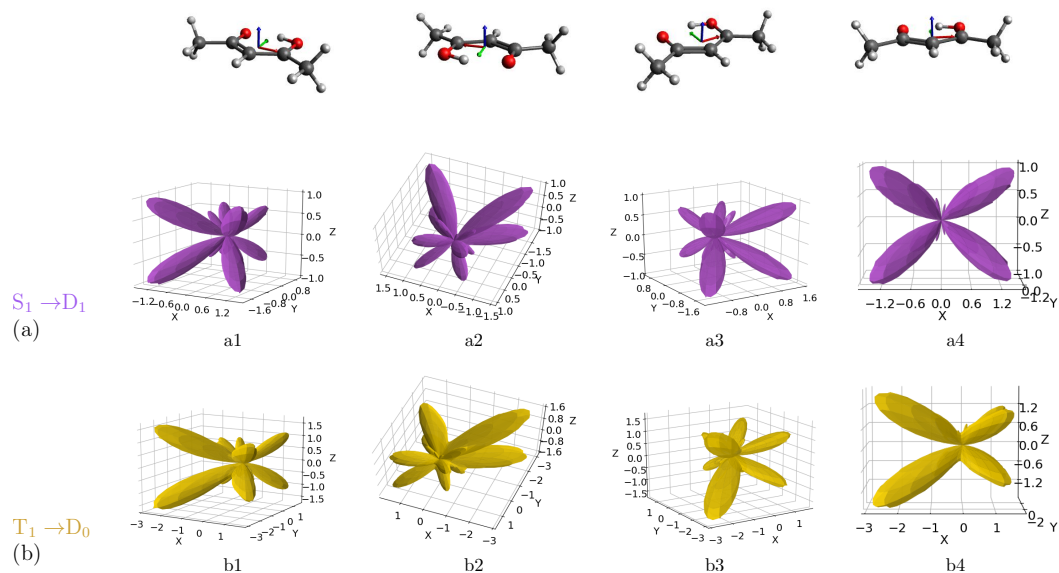

**Figure S3.** Computed MFPADs for the photoionization from the  $S_1$  (a) and  $T_1$  (b) excited states of acetylacetone to the corresponding first ionic state, at the selected kinetic energy of 7.14 eV. The electric field is oriented along the y axis. Orientation of the molecule is also shown on top of figure (x, y, z axes are respectively identified by red, green and blue colours).

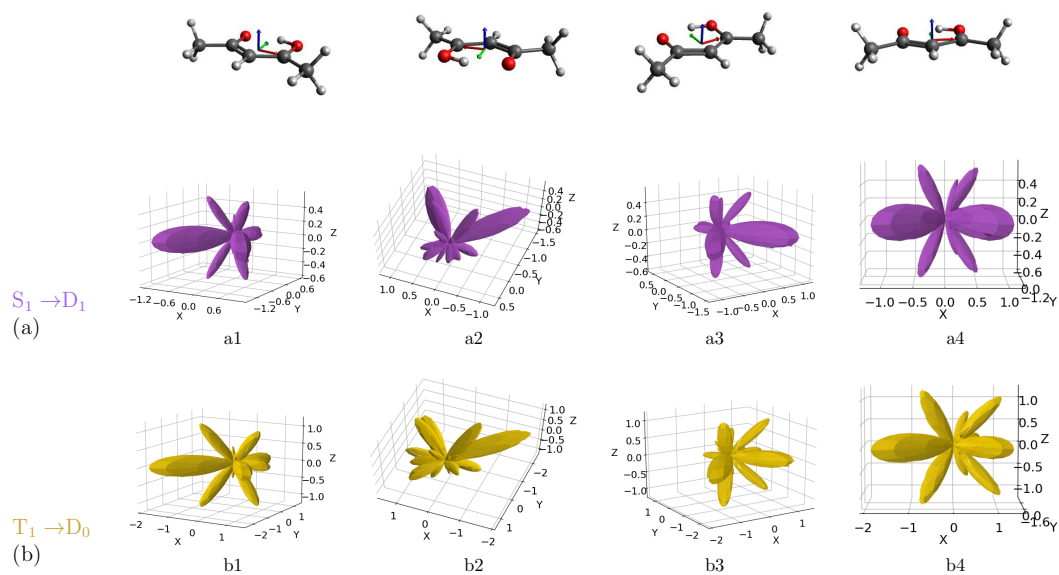

**Figure S4.** Computed MFPADs for the photoionization from the  $S_1$  (a) and  $T_1$  (b) excited states of acetylacetone to the corresponding first ionic state, at the selected kinetic energy of 7.14 eV. The electric field is oriented along the z axis. Orientation of the molecule is also shown on top of figure (x, y, z axes are respectively identified by red, green and blue colours).
